# Supplementary material
Source: Springer Nature journal article supplement (https://www.springermedizin.de/resource/supplementary/12889_2007_836_MOESM1_ESM.pdf/9501890)
Supplement: MOESM1 [file 9501890]

**Improved  
mental health**

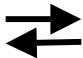

**Improved  
physical health**

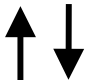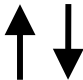

**EMPOWERMENT**

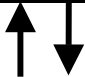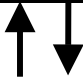

**Improved competence, self-reliance and self-esteem**

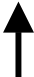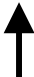

**Social and economic interventions for women**
